# Supplementary material
Source: publisher figshare collection journal article supplement (https://gsapubs.figshare.com/ndownloader/files/23319719)
Supplement: Supplementary file 1 [file 23319719]

## Sheet: PlotDat2
Source sheet	Sheet1	0.2	8.82524	1	9.05341	0.282581	0.85	8.77083
Plot name	Average1	14.8	8.82524	2	9.31728	0.324624	1.15	8.77083
Plot Type	15			3	8.52957	0.286004	1.15	9.33599
1st free col	8			4	9.26521	0.340877	0.85	9.33599
Sigma Level	2			5	8.98998	0.296323	0.85	8.77083
Absolute Errs	TRUE			6	8.33435	0.231104	ErrBox	ErrBox
Symbol Type	1			7	8.87351	0.26023	1.85	8.99265
Inverse Plot	FALSE			8	8.39531	0.228208	2.15	8.99265
Color Plot	TRUE			9	8.10911	0.216548	2.15	9.6419
3D plot	FALSE			10	9.72596	0.289359	1.85	9.6419
Linear	FALSE			11	9.36425	0.270131	1.85	8.99265
Data Range	B4:C17			12	8.83418	0.31666	ErrBox	ErrBox
Filled Symbols	TRUE			13	9.01676	0.346691	2.85	8.24356
ConcAge	FALSE			14	9.42376	0.479454	3.15	8.24356
ConcSwap	FALSE			IsoLine	IsoLine	IsoLine	3.15	8.81557
1st Symbol-row	1						2.85	8.81557
							2.85	8.24356
							ErrBox	ErrBox
							3.85	8.92433
							4.15	8.92433
							4.15	9.60609
							3.85	9.60609
							3.85	8.92433
							ErrBox	ErrBox
							4.85	8.69366
							5.15	8.69366
							5.15	9.2863
							4.85	9.2863
							4.85	8.69366
							ErrBox	ErrBox
							5.85	8.10325
							6.15	8.10325
							6.15	8.56546
							5.85	8.56546
							5.85	8.10325
							ErrBox	ErrBox
							6.85	8.61328
							7.15	8.61328
							7.15	9.13374
							6.85	9.13374
							6.85	8.61328
							ErrBox	ErrBox
							7.85	8.1671
							8.15	8.1671
							8.15	8.62351
							7.85	8.62351
							7.85	8.1671
							ErrBox	ErrBox
							8.85	7.89256
							9.15	7.89256
							9.15	8.32565
							8.85	8.32565
							8.85	7.89256
							ErrBox	ErrBox
							9.85	9.4366
							10.15	9.4366
							10.15	10.0153
							9.85	10.0153
							9.85	9.4366
							ErrBox	ErrBox
							10.85	9.09412
							11.15	9.09412
							11.15	9.63438
							10.85	9.63438
							10.85	9.09412
							ErrBox	ErrBox
							11.85	8.51752
							12.15	8.51752
							12.15	9.15084
							11.85	9.15084
							11.85	8.51752
							ErrBox	ErrBox
							12.85	8.67007
							13.15	8.67007
							13.15	9.36346
							12.85	9.36346
							12.85	8.67007
							ErrBox	ErrBox
							13.85	8.94431
							14.15	8.94431
							14.15	9.90322
							13.85	9.90322
							13.85	8.94431
							ErrBox	ErrBox

## Sheet: PlotDat3
Source sheet	Sheet1	0.2	6.75935	1	6.66433	0.290452	0.85	6.37388
Plot name	Average2	14.8	6.75935	2	6.58409	0.34851	1.15	6.37388
Plot Type	15			3	7.06889	0.360498	1.15	6.95478
1st free col	8			4	6.79584	0.300176	0.85	6.95478
Sigma Level	2			5	6.69815	0.337096	0.85	6.37388
Absolute Errs	TRUE			6	5.45599	0.334003	ErrBox	ErrBox
Symbol Type	1			7	7.11872	0.51758	1.85	6.23558
Inverse Plot	FALSE			8	6.76869	0.330057	2.15	6.23558
Color Plot	TRUE			9	7.15274	0.402683	2.15	6.9326
3D plot	FALSE			10	6.57281	0.223778	1.85	6.9326
Linear	FALSE			11	7.56041	0.260568	1.85	6.23558
Data Range	F4:G17			12	7.0478	0.256156	ErrBox	ErrBox
Filled Symbols	TRUE			13	6.69776	0.349804	2.85	6.70839
ConcAge	FALSE			14	6.48088	0.270204	3.15	6.70839
ConcSwap	FALSE			IsoLine	IsoLine	IsoLine	3.15	7.42939
1st Symbol-row	1						2.85	7.42939
							2.85	6.70839
							ErrBox	ErrBox
							3.85	6.49566
							4.15	6.49566
							4.15	7.09601
							3.85	7.09601
							3.85	6.49566
							ErrBox	ErrBox
							4.85	6.36105
							5.15	6.36105
							5.15	7.03524
							4.85	7.03524
							4.85	6.36105
							ErrBox	ErrBox
							5.85	5.12199
							6.15	5.12199
							6.15	5.78999
							5.85	5.78999
							5.85	5.12199
							ErrBox	ErrBox
							6.85	6.60114
							7.15	6.60114
							7.15	7.6363
							6.85	7.6363
							6.85	6.60114
							ErrBox	ErrBox
							7.85	6.43863
							8.15	6.43863
							8.15	7.09874
							7.85	7.09874
							7.85	6.43863
							ErrBox	ErrBox
							8.85	6.75006
							9.15	6.75006
							9.15	7.55543
							8.85	7.55543
							8.85	6.75006
							ErrBox	ErrBox
							9.85	6.34903
							10.15	6.34903
							10.15	6.79659
							9.85	6.79659
							9.85	6.34903
							ErrBox	ErrBox
							10.85	7.29984
							11.15	7.29984
							11.15	7.82098
							10.85	7.82098
							10.85	7.29984
							ErrBox	ErrBox
							11.85	6.79164
							12.15	6.79164
							12.15	7.30395
							11.85	7.30395
							11.85	6.79164
							ErrBox	ErrBox
							12.85	6.34796
							13.15	6.34796
							13.15	7.04757
							12.85	7.04757
							12.85	6.34796
							ErrBox	ErrBox
							13.85	6.21068
							14.15	6.21068
							14.15	6.75109
							13.85	6.75109
							13.85	6.21068
							ErrBox	ErrBox

## Sheet: PlotDat4
Source sheet	Sheet1	0.2	6.27038	1	6.29506	0.34097	0.85	5.95409
Plot name	Average3	14.8	6.27038	2	5.11419	0.276909	1.15	5.95409
Plot Type	15			3	5.92015	0.383928	1.15	6.63603
1st free col	8			4	6.76351	0.369791	0.85	6.63603
Sigma Level	2			5	5.7911	0.489153	0.85	5.95409
Absolute Errs	TRUE			6	6.70284	0.439536	ErrBox	ErrBox
Symbol Type	1			7	6.69791	0.358134	1.85	4.83728
Inverse Plot	FALSE			8	6.73287	0.283379	2.15	4.83728
Color Plot	TRUE			9	5.36199	0.277733	2.15	5.3911
3D plot	FALSE			10	6.8033	0.336282	1.85	5.3911
Linear	FALSE			11	6.68278	0.52568	1.85	4.83728
Data Range	J4:K17			12	6.84392	0.213613	ErrBox	ErrBox
Filled Symbols	TRUE			13	6.01387	0.440471	2.85	5.53622
ConcAge	FALSE			14	6.1401	0.308711	3.15	5.53622
ConcSwap	FALSE			IsoLine	IsoLine	IsoLine	3.15	6.30408
1st Symbol-row	1						2.85	6.30408
							2.85	5.53622
							ErrBox	ErrBox
							3.85	6.39372
							4.15	6.39372
							4.15	7.1333
							3.85	7.1333
							3.85	6.39372
							ErrBox	ErrBox
							4.85	5.30194
							5.15	5.30194
							5.15	6.28025
							4.85	6.28025
							4.85	5.30194
							ErrBox	ErrBox
							5.85	6.2633
							6.15	6.2633
							6.15	7.14237
							5.85	7.14237
							5.85	6.2633
							ErrBox	ErrBox
							6.85	6.33977
							7.15	6.33977
							7.15	7.05604
							6.85	7.05604
							6.85	6.33977
							ErrBox	ErrBox
							7.85	6.44949
							8.15	6.44949
							8.15	7.01625
							7.85	7.01625
							7.85	6.44949
							ErrBox	ErrBox
							8.85	5.08426
							9.15	5.08426
							9.15	5.63972
							8.85	5.63972
							8.85	5.08426
							ErrBox	ErrBox
							9.85	6.46702
							10.15	6.46702
							10.15	7.13958
							9.85	7.13958
							9.85	6.46702
							ErrBox	ErrBox
							10.85	6.1571
							11.15	6.1571
							11.15	7.20846
							10.85	7.20846
							10.85	6.1571
							ErrBox	ErrBox
							11.85	6.6303
							12.15	6.6303
							12.15	7.05753
							11.85	7.05753
							11.85	6.6303
							ErrBox	ErrBox
							12.85	5.5734
							13.15	5.5734
							13.15	6.45434
							12.85	6.45434
							12.85	5.5734
							ErrBox	ErrBox
							13.85	5.83139
							14.15	5.83139
							14.15	6.44881
							13.85	6.44881
							13.85	5.83139
							ErrBox	ErrBox

## Sheet: PlotDat5
Source sheet	Sheet1	0.2	6.37992	1	5.92278	0.552269	0.85	5.37052
Plot name	Average4	14.8	6.37992	2	6.24964	0.466501	1.15	5.37052
Plot Type	15			3	5.92619	0.446131	1.15	6.47505
1st free col	8			4	6.12787	0.535146	0.85	6.47505
Sigma Level	2			5	6.1959	0.47569	0.85	5.37052
Absolute Errs	TRUE			6	6.51448	0.788651	ErrBox	ErrBox
Symbol Type	1			7	6.61477	0.26295	1.85	5.78314
Inverse Plot	FALSE			8	5.74724	0.31137	2.15	5.78314
Color Plot	TRUE			9	5.47365	0.213151	2.15	6.71614
3D plot	FALSE			10	6.97548	0.334505	1.85	6.71614
Linear	FALSE			11	6.35116	0.185054	1.85	5.78314
Data Range	N4:O17			12	7.02895	0.232525	ErrBox	ErrBox
Filled Symbols	TRUE			13	7.32224	0.437921	2.85	5.48006
ConcAge	FALSE			14	7.38065	0.364552	3.15	5.48006
ConcSwap	FALSE			IsoLine	IsoLine	IsoLine	3.15	6.37232
1st Symbol-row	1						2.85	6.37232
							2.85	5.48006
							ErrBox	ErrBox
							3.85	5.59272
							4.15	5.59272
							4.15	6.66302
							3.85	6.66302
							3.85	5.59272
							ErrBox	ErrBox
							4.85	5.72021
							5.15	5.72021
							5.15	6.67159
							4.85	6.67159
							4.85	5.72021
							ErrBox	ErrBox
							5.85	5.72583
							6.15	5.72583
							6.15	7.30313
							5.85	7.30313
							5.85	5.72583
							ErrBox	ErrBox
							6.85	6.35182
							7.15	6.35182
							7.15	6.87772
							6.85	6.87772
							6.85	6.35182
							ErrBox	ErrBox
							7.85	5.43587
							8.15	5.43587
							8.15	6.05861
							7.85	6.05861
							7.85	5.43587
							ErrBox	ErrBox
							8.85	5.2605
							9.15	5.2605
							9.15	5.6868
							8.85	5.6868
							8.85	5.2605
							ErrBox	ErrBox
							9.85	6.64097
							10.15	6.64097
							10.15	7.30998
							9.85	7.30998
							9.85	6.64097
							ErrBox	ErrBox
							10.85	6.1661
							11.15	6.1661
							11.15	6.53621
							10.85	6.53621
							10.85	6.1661
							ErrBox	ErrBox
							11.85	6.79642
							12.15	6.79642
							12.15	7.26147
							11.85	7.26147
							11.85	6.79642
							ErrBox	ErrBox
							12.85	6.88432
							13.15	6.88432
							13.15	7.76016
							12.85	7.76016
							12.85	6.88432
							ErrBox	ErrBox
							13.85	7.01609
							14.15	7.01609
							14.15	7.7452
							13.85	7.7452
							13.85	7.01609
							ErrBox	ErrBox

## Sheet: Sheet1
Tables DR5. in situ O-isotope compositions of zircons from the granitic batholiths in the WKOB.
WK1608	δ18O	2σ		WK1621	δ18O	2σ		WK1635	δ18O	2σ		WK1618	δ18O	2σ
1	9.05341	0.282581		1	6.66433	0.290452		1	6.29506	0.34097		1	5.92278	0.552269
2	9.31728	0.324624		2	6.58409	0.34851		2	5.11419	0.276909		2	6.24964	0.466501
3	8.52957	0.286004		3	7.06889	0.360498		3	5.92015	0.383928		3	5.92619	0.446131
4	9.26521	0.340877		4	6.79584	0.300176		4	6.76351	0.369791		4	6.12787	0.535146
5	8.98998	0.296323		5	6.69815	0.337096		5	5.7911	0.489153		5	6.1959	0.47569
6	8.33435	0.231104		6	5.45599	0.334003		6	6.70284	0.439536		6	6.51448	0.788651
7	8.87351	0.26023		7	7.11872	0.51758		7	6.69791	0.358134		7	6.61477	0.26295
8	8.39531	0.228208		8	6.76869	0.330057		8	6.73287	0.283379		8	5.74724	0.31137
9	8.10911	0.216548		9	7.15274	0.402683		9	5.36199	0.277733		9	5.47365	0.213151
10	9.72596	0.289359		10	6.57281	0.223778		10	6.8033	0.336282		10	6.97548	0.334505
11	9.36425	0.270131		11	7.56041	0.260568		11	6.68278	0.52568		11	6.35116	0.185054
12	8.83418	0.31666		12	7.0478	0.256156		12	6.84392	0.213613		12	7.02895	0.232525
13	9.01676	0.346691		13	6.69776	0.349804		13	6.01387	0.440471		13	7.32224	0.437921
14	9.42376	0.479454		14	6.48088	0.270204		14	6.1401	0.308711		14	7.38065	0.364552
